# Supplementary material for: Development and Validation of a Pyroptosis-Related Long Non-coding RNA Signature for Hepatocellular Carcinoma
Source: Front Cell Dev Biol. 2021 Nov 15;9:713925. doi: 10.3389/fcell.2021.713925 (PMC8634266; doi:10.3389/fcell.2021.713925)
Supplement: Supplementary file 2 [file Data_Sheet_2.xlsx]

## Sheet: Table S1
Table S1. The information of 33 pyroptosis-related genes (PRGs).
Genes	Full-names
AIM2	Absent in melanoma 2
CASP1	cysteine-aspartic acid protease-1
CASP3	cysteine-aspartic acid protease-3
CASP4	cysteine-aspartic acid protease-4
CASP5	cysteine-aspartic acid protease-5
CASP6	cysteine-aspartic acid protease-6
CASP8	cysteine-aspartic acid protease-8
CASP9	cysteine-aspartic acid protease-9
ELANE	elastase, neutrophil expressed
GPX4	glutathione peroxidase 4
GSDMA	gasdermin A
GSDMB	gasdermin B
GSDMC	gasdermin C
GSDMD	gasdermin D
GSDME	gasdermin E
IL18	interleukin 18
IL1B	interleukin 1 beta
IL6	interleukin 6
NLRC4	NLR family CARD domain containing 4
NLRP1	NLR family pyrin domain containing 1
NLRP2	NLR family pyrin domain containing 2
NLRP3	NLR family pyrin domain containing 3
NLRP6	NLR family pyrin domain containing 6
NLRP7	NLR family pyrin domain containing 7
NOD1	nucleotide binding oligomerization domain containing 1
NOD2	nucleotide binding oligomerization domain containing 2
PJVK	pejvakin/deafness, autosomal recessive 59
PLCG1	phospholipase C gamma 1
PRKACA	protein kinase cAMP-activated catalytic subunit alpha
PYCARD	PYD and CARD domain containing
SCAF11	SR-related CTD associated factor 11
TIRAP	TIR domain containing adaptor protein
TNF	tumor necrosis factor

## Sheet: Table S2
Table S2. The location of CNV alteration of pyroptosis-related genes on chromosomes.
Chromosome	chromStart	chromEnd	Gene
chr1	15490832	15526534	CASP9
chr1	159062484	159147096	AIM2
chr1	247416156	247449108	NLRP3
chr2	32224453	32265854	NLRC4
chr2	112829751	112836903	IL1B
chr2	201233443	201287711	CASP8
chr4	109688622	109703583	CASP6
chr4	184627696	184649509	CASP3
chr6	31575567	31578336	TNF
chr7	22725884	22732002	IL6
chr7	30424527	30478784	NOD1
chr8	129748196	129786888	GSDMC
chr8	143553207	143563062	GSDMD
chr11	278365	285359	NLRP6
chr11	104942866	104969436	CASP4
chr11	104994235	105023168	CASP5
chr11	105025443	105035250	CASP1
chr11	112143251	112164117	IL18
chr11	126283065	126298845	TIRAP
chr12	45919131	45992120	SCAF11
chr16	31201485	31203450	PYCARD
chr16	50693603	50733077	NOD2
chr17	5499427	5619424	NLRP1
chr17	39904595	39919854	GSDMB
chr17	39962973	39977766	GSDMA
chr20	41136960	41196801	PLCG1
chr19	851014	856247	ELANE
chr19	1103926	1106791	GPX4
chr19	14091688	14118084	PRKACA
chr19	54923509	54966312	NLRP7
chr19	54953130	55001142	NLRP2

## Sheet: Table S3
Table S3. The univariate Cox analysis identified 336 pyroptosis-related lncRNAs.
lncRNA	HR	HR.95L	HR.95H	pvalue
AC026412.3	15.09	4.61045	49.3897	7.24801e-06
AC026271.3	15.0188	3.48063	64.8056	0.000281361
DARS-AS1	9.21117	2.08571	40.6796	0.00338977
MCM3AP-AS1	8.94041	2.69228	29.6889	0.000347152
AL008726.1	7.75535	2.32095	25.9142	0.000875152
AP003392.5	7.36176	2.58152	20.9937	0.000188653
LINC00471	6.58418	1.80983	23.9532	0.00423244
AC006064.3	6.35447	1.91701	21.0637	0.00249223
TRAF3IP2-AS1	6.2833	1.76093	22.4199	0.00462866
AC007292.2	6.25288	1.58596	24.6529	0.00882232
AC009961.1	6.19891	2.06588	18.6005	0.00113738
AC092902.2	5.73861	1.62592	20.2542	0.00662006
AC010864.1	5.49638	2.10859	14.3272	0.000490074
AC040162.3	5.42396	1.42072	20.7073	0.013371
AC073254.1	5.40232	1.72613	16.9079	0.00375915
LINC01515	5.28707	1.14684	24.374	0.0327052
AC027237.2	5.26461	1.48418	18.6744	0.0101346
AC090510.2	5.21958	1.13265	24.0534	0.0340274
AC006252.1	4.7742	1.95703	11.6468	0.00059125
AC010680.2	4.69331	1.79888	12.245	0.00157764
AC022211.3	4.67623	1.85058	11.8164	0.00110894
AL356481.1	4.60239	1.59409	13.2878	0.00477325
AC137932.3	4.39367	1.12428	17.1705	0.0333037
DUXAP8	4.3717	2.02781	9.4248	0.000167424
DDX11-AS1	4.30711	2.04856	9.05573	0.000117459
AC006449.5	4.04425	1.39771	11.702	0.00994739
AC026356.1	4.01051	2.12962	7.55262	1.70265e-05
AC097461.1	4.00856	1.55404	10.3398	0.00408095
PKD1P6-NPIPP1	3.91361	1.17075	13.0825	0.0266923
AL442125.2	3.83474	2.04401	7.19428	2.82689e-05
AC097534.2	3.78801	1.73445	8.27295	0.000832689
AF230666.1	3.73149	1.02005	13.6504	0.0465952
AC017083.1	3.50471	1.37641	8.92388	0.00854006
AL008729.1	3.49495	1.27675	9.56702	0.0148716
GHRLOS	3.47984	1.79076	6.76211	0.000234274
TBC1D8-AS1	3.4477	1.64002	7.24785	0.00109481
AP001469.2	3.44351	1.28435	9.23253	0.0139991
AL118511.1	3.43207	1.80389	6.52983	0.000171545
MKLN1-AS	3.36375	2.23555	5.06131	5.91262e-09
AL031670.1	3.35484	1.40468	8.01246	0.00643071
AL731563.3	3.32662	1.07391	10.3047	0.037199
AC018648.1	3.26889	1.01212	10.5577	0.0476925
AC010319.4	3.2363	1.35296	7.74129	0.0083075
NDUFB2-AS1	3.20515	1.42903	7.18879	0.00471068
AC107214.1	3.18592	1.53093	6.63003	0.00194231
ITPR1-DT	3.11187	1.29353	7.48631	0.0112576
LINC02449	3.01618	1.43717	6.33003	0.00351329
AL355388.2	3.01096	1.17269	7.73079	0.0219586
AC012186.2	2.98523	1.01719	8.76098	0.0464816
AL121658.1	2.8949	1.42202	5.89334	0.00338208
AL121917.1	2.87603	1.15653	7.15201	0.0230352
KDM4A-AS1	2.86702	1.90688	4.31061	4.14528e-07
AC145285.2	2.86653	1.40681	5.84083	0.00373333
OSMR-AS1	2.82574	1.38185	5.77836	0.00442592
AL078644.1	2.82061	1.3047	6.09784	0.00838637
AC021016.3	2.77644	1.3356	5.77167	0.00623782
AL451074.2	2.77362	1.192	6.45384	0.0179058
AC005534.1	2.76536	1.57332	4.86055	0.000407933
AC024451.4	2.74351	1.16698	6.44982	0.0206662
AC092614.1	2.73557	1.15459	6.48138	0.0222207
ZNF337-AS1	2.73367	1.52992	4.88456	0.000684289
AC011921.1	2.73314	1.16941	6.38786	0.020272
AL603839.2	2.71409	1.47083	5.00827	0.00140161
AC022167.2	2.70772	1.14336	6.41244	0.0235412
RBFADN	2.61817	1.10485	6.20431	0.0287813
AL671710.1	2.58449	1.28257	5.20797	0.00790473
JMJD1C-AS1	2.57217	1.40902	4.69552	0.00209378
TMCC1-AS1	2.56855	1.77461	3.71769	5.72455e-07
POLH-AS1	2.56671	1.7124	3.84725	5.00031e-06
U47924.3	2.56382	1.25329	5.24474	0.00993126
AC125437.1	2.55481	1.58555	4.11657	0.000116331
AC092910.3	2.52544	1.01677	6.27265	0.0459565
AL021707.2	2.51662	1.22421	5.17344	0.012067
AC097641.2	2.50906	1.30582	4.82105	0.00576705
AL592148.3	2.50263	1.07161	5.84465	0.0340249
AP000873.2	2.50163	1.27812	4.89639	0.0074474
SNHG26	2.49489	1.62748	3.8246	2.73616e-05
DNAJC9-AS1	2.47173	1.50859	4.04978	0.000327936
AC012360.3	2.44214	1.31028	4.55176	0.00494446
AL049597.2	2.42671	1.20358	4.89282	0.0132164
AL133215.2	2.42485	1.3623	4.31613	0.00260456
AC091057.1	2.41273	1.24646	4.67025	0.00895549
AC010327.5	2.40058	1.31892	4.3693	0.00415846
AL139289.1	2.38264	1.47165	3.85757	0.000412937
ACVR2B-AS1	2.36224	1.36744	4.08074	0.00205655
TM4SF19-AS1	2.35161	1.17344	4.71274	0.0159137
AC008969.1	2.34899	1.032	5.34665	0.0418483
AC026355.1	2.32443	1.66332	3.24832	7.81777e-07
AL512652.1	2.29297	1.19436	4.40212	0.0126425
AC027097.1	2.29144	1.59622	3.28947	6.95484e-06
AC025176.1	2.28281	1.48703	3.50445	0.00016046
AP000866.2	2.25212	1.16534	4.35242	0.015729
AL161729.4	2.22849	1.1213	4.42894	0.0222156
AL353796.1	2.21869	1.1352	4.33633	0.0197607
AL442067.1	2.21357	1.12834	4.34257	0.0208242
AC069234.5	2.20453	1.25048	3.88649	0.00628289
AC005479.2	2.20012	1.43292	3.37809	0.000313173
AC124016.1	2.18524	1.13799	4.19621	0.0188605
AL513218.1	2.17726	1.13855	4.16362	0.0186616
AC068768.1	2.1527	1.07855	4.29663	0.0296742
HMGN3-AS1	2.12746	1.39333	3.2484	0.000472264
AL513320.1	2.12	1.30922	3.43289	0.00224614
AC107068.1	2.10949	1.44055	3.08906	0.000125211
AC018690.1	2.10384	1.43081	3.09347	0.000156073
AC062029.1	2.10007	1.14235	3.86073	0.016924
ARMCX5-GPRASP2	2.09953	1.33741	3.29594	0.00126626
AL080317.3	2.09869	1.03854	4.24108	0.0388939
ZBTB11-AS1	2.08473	1.31547	3.30385	0.00176533
AP002449.1	2.0693	1.01044	4.23776	0.0467728
NUTM2B-AS1	2.06658	1.04481	4.08757	0.0369847
CTC-338M12.4	2.06469	1.10922	3.84317	0.0221982
LINC00654	2.06129	1.22315	3.47377	0.00659965
AC004943.2	2.04807	1.1486	3.65191	0.0151203
AC098484.1	2.04576	1.38622	3.0191	0.000312596
AL080317.2	2.04361	1.09652	3.80874	0.0244474
AC011632.1	2.04227	1.36312	3.05978	0.00053663
AC079174.2	2.03688	1.04321	3.97704	0.0371707
AC091057.4	2.03477	1.06626	3.88298	0.0311961
AL049840.2	2.0303	1.36353	3.02311	0.000489306
HCG15	2.02517	1.15669	3.54572	0.0135363
AC138028.6	2.01439	1.09126	3.71845	0.0251433
LINC01094	2.0066	1.39264	2.89123	0.000186023
AC008875.1	1.99513	1.16863	3.40617	0.0113742
AL356652.1	1.98877	1.05667	3.74309	0.0331048
ABALON	1.98241	1.12622	3.48949	0.0176925
AC034229.4	1.97472	1.40031	2.78477	0.000104567
AC026250.1	1.97191	1.28544	3.02497	0.00187009
AP001469.3	1.9671	1.31395	2.94492	0.0010156
AC004908.2	1.94909	1.14099	3.32953	0.0145756
AC073842.2	1.94696	1.22015	3.10671	0.00519779
AC004923.4	1.94524	1.06032	3.56869	0.0316221
AC025178.1	1.94387	1.25548	3.0097	0.00288215
AL590705.3	1.93798	1.27835	2.93797	0.00182845
LINC01224	1.92867	1.44092	2.58154	1.00747e-05
LINC01011	1.9189	1.25553	2.93276	0.00260047
AP003390.1	1.9181	1.24446	2.95639	0.00316987
AC016065.1	1.91126	1.2417	2.94188	0.00324249
AL928654.1	1.9105	1.31022	2.78579	0.00076812
AC108463.2	1.89655	1.04304	3.44846	0.0358957
AC010789.1	1.88947	1.38302	2.5814	6.42104e-05
LINC01232	1.88481	1.34496	2.64133	0.000232068
AC021851.1	1.8773	1.07645	3.27397	0.0264478
AC015961.2	1.86818	1.06983	3.26228	0.0279996
AL136537.2	1.86197	1.12119	3.09219	0.0163067
AC079684.1	1.85971	1.08705	3.18157	0.0235348
AC253576.2	1.85162	1.01052	3.3928	0.0461719
AL158166.1	1.85037	1.3676	2.50354	6.62033e-05
AC124312.3	1.84421	1.05024	3.23841	0.0331232
AL031985.3	1.83468	1.49648	2.24931	5.29468e-09
AC022150.4	1.8296	1.12189	2.98375	0.0154839
LINC02038	1.82074	1.22536	2.70541	0.00301872
AL035563.1	1.81793	1.03105	3.20535	0.0388635
AC131009.1	1.81743	1.39795	2.36278	8.11474e-06
AC128709.1	1.7833	1.19895	2.65246	0.00429411
AC016737.1	1.77518	1.02136	3.08535	0.0418599
AC092611.2	1.77388	1.01709	3.09378	0.0434179
AC145207.5	1.76722	1.36287	2.29153	1.7435e-05
AC084864.1	1.75378	1.04062	2.95571	0.0349048
Z82243.1	1.75309	1.00178	3.06784	0.0492749
ATP1A1-AS1	1.74953	1.18287	2.58766	0.0050955
AC100861.1	1.73867	1.16638	2.59175	0.00661614
OR2A1-AS1	1.73074	1.03568	2.89225	0.0362787
AL445645.1	1.7141	1.00134	2.9342	0.0494307
AC073389.3	1.7114	1.09479	2.67529	0.0184104
AL133243.2	1.70106	1.12317	2.57628	0.0121269
GSEC	1.69936	1.31218	2.2008	5.83503e-05
SNHG21	1.67022	1.2118	2.30206	0.0017274
AC017100.1	1.66823	1.19131	2.33608	0.00289269
CAPN10-DT	1.66463	1.02964	2.69122	0.0376065
AL357079.1	1.66269	1.13877	2.42765	0.00846629
AL353708.3	1.66085	1.06325	2.59435	0.0257828
AL732292.2	1.64182	1.01273	2.66169	0.0442967
AC068152.1	1.62873	1.13543	2.33637	0.00805111
AC063948.1	1.60321	1.01657	2.52838	0.0422877
AC007406.3	1.59072	1.00823	2.50976	0.0460239
AL136531.1	1.59003	1.0584	2.38871	0.0255306
AP002954.1	1.58252	1.00005	2.50425	0.0499765
AL117336.3	1.56655	1.30183	1.8851	2.00524e-06
AP000553.2	1.56374	1.07451	2.27573	0.0195258
AC026367.3	1.53728	1.09236	2.16341	0.0136351
AC100872.1	1.52448	1.24327	1.86929	5.05642e-05
AC022007.1	1.52215	1.08074	2.14385	0.0162015
NCK1-DT	1.51326	1.20123	1.90636	0.00043799
AL049840.3	1.51041	1.07505	2.12206	0.0174472
AC004812.2	1.50994	1.06954	2.13167	0.019177
AC069544.1	1.50109	1.10756	2.03444	0.00882987
AC012467.2	1.49459	1.18258	1.88894	0.000769328
AP001453.3	1.49011	1.03983	2.13538	0.0298025
AC073611.1	1.48893	1.1772	1.8832	0.000896616
AL139286.2	1.48609	1.03971	2.12411	0.0297335
ZNF674-AS1	1.48531	1.11917	1.97123	0.00615121
AC093227.1	1.48475	1.14701	1.92194	0.00268563
SNHG4	1.47584	1.27644	1.70638	1.4741e-07
AC074117.1	1.46709	1.19328	1.80373	0.000276371
SREBF2-AS1	1.45643	1.16706	1.81754	0.000877895
ZEB1-AS1	1.45368	1.16714	1.81055	0.000838236
AC073896.3	1.45358	1.03183	2.04773	0.0324241
AL035701.1	1.44823	1.07771	1.94612	0.0140356
LINC01138	1.44795	1.22021	1.71819	2.24121e-05
TFAP2A-AS1	1.44644	1.06508	1.96434	0.0180901
AC102953.2	1.44012	1.0565	1.96303	0.0210151
AC099066.2	1.43107	1.10257	1.85743	0.00706266
AC096711.3	1.42397	1.05997	1.91297	0.0189424
FAM111A-DT	1.42314	1.02072	1.98422	0.037444
GASAL1	1.42262	1.16641	1.73511	0.000502631
LINC02561	1.41761	1.16126	1.73054	0.000605636
AL359504.2	1.41458	1.07207	1.86651	0.0142093
AC010973.2	1.41394	1.06153	1.88335	0.0178755
LINC01336	1.40571	1.05691	1.86964	0.0192674
AC091182.1	1.40531	1.10222	1.79173	0.00604682
SBF2-AS1	1.40417	1.11195	1.77319	0.00435398
AC010761.1	1.40271	1.11468	1.76517	0.00390413
AC107959.3	1.38256	1.15262	1.65838	0.000482255
GPR1-AS	1.38187	1.14078	1.67392	0.000944944
AC131532.1	1.37715	1.00132	1.89404	0.0490573
AC068756.1	1.37681	1.10582	1.7142	0.00424425
AC024361.1	1.37528	1.03174	1.83322	0.029779
AC087741.1	1.37387	1.03212	1.82878	0.0295083
AC078778.1	1.36659	1.07779	1.73279	0.009926
THUMPD3-AS1	1.36426	1.16119	1.60284	0.00015843
AL133467.4	1.3618	1.02249	1.81373	0.0346823
AC000123.1	1.34877	1.02184	1.78029	0.0346433
AC007038.2	1.34612	1.00191	1.80858	0.0485356
AC025580.1	1.32679	1.08801	1.61798	0.00521926
AP003469.2	1.32188	1.13035	1.54587	0.000475692
LINC00862	1.30801	1.0816	1.58181	0.00562439
AC006026.3	1.30722	1.0476	1.63118	0.0177109
AC026369.2	1.30587	1.06764	1.59726	0.00940775
AC108676.1	1.30457	1.1181	1.52213	0.000728736
SNHG10	1.29463	1.12505	1.48978	0.000312462
AL117335.1	1.29073	1.00766	1.65333	0.0433438
AC016394.1	1.28969	1.08524	1.53265	0.00386547
SNHG14	1.28076	1.08025	1.51848	0.00439151
LENG8-AS1	1.27184	1.03333	1.56539	0.0232448
NIFK-AS1	1.27075	1.05186	1.53518	0.0129871
AC007541.1	1.26613	1.01572	1.57829	0.035848
BBOX1-AS1	1.26357	1.1045	1.44554	0.000654722
AC067852.2	1.24944	1.00464	1.5539	0.0453295
SNHG20	1.24845	1.03587	1.50466	0.0198054
AL121721.1	1.2351	1.08312	1.40841	0.00162294
AC124067.2	1.23347	1.03942	1.46376	0.016278
BX537318.1	1.23282	1.03976	1.46173	0.0160106
PTOV1-AS1	1.2328	1.03445	1.46918	0.0193685
NRSN2-AS1	1.23267	1.03707	1.46518	0.0176526
NRAV	1.23212	1.12566	1.34866	5.9741e-06
AP002360.3	1.23053	1.00918	1.50044	0.0403359
PLBD1-AS1	1.2218	1.03663	1.44006	0.0168971
AC124798.1	1.22058	1.09297	1.3631	0.000403574
LINC00623	1.21147	1.04346	1.40652	0.0117843
BACE1-AS	1.21074	1.09644	1.33697	0.000157125
AC009549.1	1.21014	1.00449	1.4579	0.0447407
Z95115.1	1.20853	1.04946	1.3917	0.00852632
LINC00857	1.20467	1.01443	1.43059	0.0337209
AC110285.6	1.20266	1.01607	1.42352	0.0319276
AL359921.2	1.20119	1.0604	1.36067	0.00395137
AC004816.1	1.2005	1.06758	1.34996	0.00227112
AC068580.1	1.19619	1.01166	1.41438	0.0361238
AC040970.1	1.19502	1.0595	1.34788	0.0037196
AC034213.1	1.19502	1.05132	1.35837	0.00642019
AL606489.1	1.19183	1.03155	1.37703	0.0172449
AC079209.1	1.1868	1.0108	1.39343	0.036517
AC005586.2	1.18	1.00292	1.38835	0.0460339
RBPMS-AS1	1.17874	1.02631	1.3538	0.0199329
AC009779.2	1.17798	1.09011	1.27293	3.45141e-05
AL137186.2	1.17763	1.00701	1.37715	0.0406165
AC005332.5	1.17669	1.05398	1.31368	0.00378478
PXN-AS1	1.17391	1.0317	1.33573	0.0149518
LINC00294	1.17004	1.00197	1.3663	0.0471558
AC016747.1	1.16803	1.05712	1.29058	0.00227992
AC018645.2	1.15957	1.0386	1.29463	0.00844484
AC007405.3	1.1571	1.05617	1.26768	0.00172779
AC114489.1	1.15472	1.01932	1.3081	0.0237783
AC007383.2	1.15382	1.00281	1.32757	0.0455903
FOXD2-AS1	1.15004	1.05609	1.25236	0.00130507
PVT1	1.14916	1.02758	1.28513	0.0148189
AL050341.2	1.14867	1.04202	1.26624	0.00530529
AL133370.1	1.14518	1.03126	1.27168	0.0112207
LINC00958	1.14153	1.01724	1.28099	0.024406
AC099850.3	1.1396	1.08697	1.19478	6.07606e-08
AL365203.2	1.13673	1.07468	1.20237	7.6534e-06
MELTF-AS1	1.13309	1.01507	1.26483	0.0259854
LINC00665	1.13001	1.04701	1.21959	0.00168798
AC108752.1	1.12957	1.07283	1.1893	3.59443e-06
SNHG12	1.129	1.0296	1.23799	0.00987031
AC087741.2	1.12865	1.03044	1.23622	0.00917286
AC106900.2	1.12598	1.00887	1.25668	0.0342114
AC116351.1	1.12572	1.00198	1.26473	0.0462247
AC016710.1	1.12273	1.01966	1.23621	0.0184619
OTUD6B-AS1	1.12162	1.02422	1.22827	0.0132713
RNASEH1-AS1	1.12009	1.01509	1.23595	0.0239316
MIR4435-2HG	1.11802	1.03732	1.20499	0.00351448
AC008771.1	1.11719	1.02613	1.21633	0.0106295
AP003469.4	1.11376	1.00565	1.2335	0.0386373
LINC00221	1.11192	1.03302	1.19684	0.00472669
AC008735.2	1.10621	1.00109	1.22237	0.0475538
AL080317.1	1.10602	1.01555	1.20456	0.0206551
LINC02331	1.10558	1.02509	1.1924	0.00925294
AC245297.3	1.10453	1.01356	1.20365	0.0233767
AC084033.3	1.10346	1.01034	1.20517	0.0286252
AC009237.14	1.09959	1.00162	1.20714	0.0461509
SNHG16	1.09951	1.00397	1.20414	0.0408093
ARRDC1-AS1	1.09909	1.01827	1.18633	0.0153282
AL354892.2	1.0965	1.00649	1.19456	0.0350354
AC083799.1	1.09608	1.03354	1.16241	0.00221081
ZFPM2-AS1	1.09331	1.05268	1.13551	3.90144e-06
WAC-AS1	1.08896	1.04292	1.13704	0.000110285
PICSAR	1.08807	1.0337	1.1453	0.0012493
AC026401.3	1.08419	1.0357	1.13494	0.000534731
AL035461.2	1.07857	1.0063	1.15603	0.032557
AC012146.1	1.07826	1.00669	1.15491	0.0315241
AL049840.4	1.06885	1.0216	1.11828	0.00389724
LINC02001	1.06837	1.01162	1.1283	0.0175581
SNHG3	1.06758	1.0374	1.09864	7.83217e-06
AC005288.1	1.05911	1.00357	1.11772	0.0366584
SNHG1	1.04025	1.01246	1.0688	0.00428123
LINC00942	1.03718	1.02121	1.05339	4.00899e-06
CYTOR	1.03378	1.00989	1.05823	0.00534967
FGD5-AS1	1.02821	1.00441	1.05257	0.0198788
SNHG7	1.02615	1.0007	1.05225	0.0439867
AC115619.1	0.981635	0.970823	0.992567	0.00103738
AC009283.1	0.909623	0.843268	0.981198	0.0142417
AP001065.1	0.900136	0.831304	0.974668	0.00953825
AC253536.6	0.896707	0.80436	0.999657	0.0492803
F11-AS1	0.860797	0.770329	0.96189	0.00814986
CDC37L1-DT	0.789426	0.632189	0.985771	0.0369404
HPN-AS1	0.775107	0.606193	0.991087	0.042219
TMEM220-AS1	0.758498	0.652252	0.882051	0.000330685
AC015908.3	0.68512	0.571229	0.82172	4.56613e-05
IQCH-AS1	0.577682	0.356525	0.936023	0.0258496
AC015908.2	0.447985	0.258683	0.775817	0.00415795
AC067945.3	0.42592	0.185287	0.979063	0.0444535
AC021491.4	0.36549	0.176987	0.754759	0.00652003
AC003956.1	0.274794	0.0856954	0.881163	0.029798
AC006369.1	0.251822	0.087068	0.728333	0.0109286
LINC00892	0.246012	0.0611678	0.989439	0.0482777
AC007686.3	0.123689	0.0207614	0.736894	0.0217181

## Sheet: Table S4
Table S4. GSVA enrichment analysis investigate the biological function in cluster 1.
id	logFC	AveExpr	t	P.Value	adj.P.Val	B
KEGG_ERBB_SIGNALING_PATHWAY	-0.151925	-0.0737049	-5.38592	1.47142e-07	1.92767e-05	7.09294
KEGG_ENDOMETRIAL_CANCER	-0.180286	-0.062806	-5.31684	2.08397e-07	1.92767e-05	6.77029
KEGG_COLORECTAL_CANCER	-0.167323	-0.0888131	-5.01543	9.13693e-07	5.63444e-05	5.4027
KEGG_PROGESTERONE_MEDIATED_OOCYTE_MATURATION	-0.152452	-0.0945145	-4.9472	1.26497e-06	5.80292e-05	5.10234
KEGG_ACUTE_MYELOID_LEUKEMIA	-0.160307	-0.0710127	-4.9017	1.56836e-06	5.80292e-05	4.90398
KEGG_RENAL_CELL_CARCINOMA	-0.162141	-0.0870863	-4.83568	2.13657e-06	6.58777e-05	4.61892
KEGG_NEUROTROPHIN_SIGNALING_PATHWAY	-0.150779	-0.0801923	-4.7137	3.7503e-06	9.57764e-05	4.10083
KEGG_NON_SMALL_CELL_LUNG_CANCER	-0.138005	-0.0825579	-4.69192	4.14168e-06	9.57764e-05	4.00951
KEGG_ADHERENS_JUNCTION	-0.157802	-0.0785565	-4.59008	6.55655e-06	0.000134774	3.58733
KEGG_OOCYTE_MEIOSIS	-0.139756	-0.0918882	-4.53067	8.53975e-06	0.000149317	3.34475
KEGG_PROSTATE_CANCER	-0.131673	-0.0598839	-4.50561	9.5394e-06	0.000149317	3.24321
KEGG_INOSITOL_PHOSPHATE_METABOLISM	-0.165927	-0.0692633	-4.50216	9.68544e-06	0.000149317	3.22928
KEGG_PANCREATIC_CANCER	-0.149895	-0.0910269	-4.43511	1.29895e-05	0.000184851	2.96026
KEGG_GLIOMA	-0.121577	-0.0698332	-4.4143	1.42184e-05	0.000187886	2.87747
KEGG_SPHINGOLIPID_METABOLISM	-0.122526	-0.052095	-4.28333	2.49186e-05	0.000307329	2.36431
KEGG_GLYCOSYLPHOSPHATIDYLINOSITOL_GPI_ANCHOR_BIOSYNTHESIS	-0.182788	-0.109915	-4.2581	2.77206e-05	0.000308405	2.26699
KEGG_MTOR_SIGNALING_PATHWAY	-0.131938	-0.0887153	-4.25285	2.83399e-05	0.000308405	2.24681
KEGG_UBIQUITIN_MEDIATED_PROTEOLYSIS	-0.166501	-0.106913	-4.2131	3.34792e-05	0.000344092	2.09473
KEGG_CHRONIC_MYELOID_LEUKEMIA	-0.148232	-0.0910581	-4.1904	3.68018e-05	0.000358333	2.00843
KEGG_WNT_SIGNALING_PATHWAY	-0.116047	-0.0575802	-4.1165	4.99383e-05	0.000461929	1.73031
KEGG_BASAL_TRANSCRIPTION_FACTORS	-0.165283	-0.101488	-4.0685	6.07447e-05	0.000510808	1.55206
KEGG_TIGHT_JUNCTION	-0.104451	-0.0482495	-4.04478	6.68767e-05	0.000537921	1.46462
KEGG_RIG_I_LIKE_RECEPTOR_SIGNALING_PATHWAY	-0.111614	-0.0520352	-3.98713	8.43192e-05	0.000624665	1.2541
KEGG_VEGF_SIGNALING_PATHWAY	-0.103343	-0.0615239	-3.98685	8.44142e-05	0.000624665	1.25307
KEGG_LYSINE_DEGRADATION	-0.138074	-0.0108557	-3.97336	8.90833e-05	0.000633862	1.20421
KEGG_SMALL_CELL_LUNG_CANCER	-0.134317	-0.0787371	-3.91101	0.000114042	0.000781398	0.980232
KEGG_NON_HOMOLOGOUS_END_JOINING	-0.192538	-0.145271	-3.82846	0.000157391	0.00103166	0.688609
KEGG_ENDOCYTOSIS	-0.118489	-0.081915	-3.82131	0.000161806	0.00103166	0.663593
KEGG_CELL_CYCLE	-0.162134	-0.143984	-3.7712	0.000196171	0.0011707	0.489598
KEGG_LONG_TERM_POTENTIATION	-0.101883	-0.0535829	-3.72992	0.00022955	0.00132708	0.34781
KEGG_CIRCADIAN_RHYTHM_MAMMAL	-0.166515	-0.0484183	-3.72178	0.000236735	0.00132715	0.320018
KEGG_GAP_JUNCTION	-0.112596	-0.0649011	-3.65298	0.000306509	0.00160219	0.0873525
KEGG_MISMATCH_REPAIR	-0.204702	-0.137793	-3.6484	0.000311778	0.00160219	0.0720185
KEGG_PHOSPHATIDYLINOSITOL_SIGNALING_SYSTEM	-0.132429	-0.0676427	-3.63812	0.000323928	0.00161964	0.0376277
KEGG_DORSO_VENTRAL_AXIS_FORMATION	-0.146376	-0.0428247	-3.62201	0.00034387	0.00163801	-0.0160951
KEGG_PATHWAYS_IN_CANCER	-0.103659	-0.0611433	-3.62088	0.000345311	0.00163801	-0.0198538
KEGG_THYROID_CANCER	-0.123124	-0.0883155	-3.5029	0.000531294	0.00243335	-0.406478
KEGG_NUCLEOTIDE_EXCISION_REPAIR	-0.158052	-0.128289	-3.49875	0.000539283	0.00243335	-0.419844
KEGG_FOLATE_BIOSYNTHESIS	0.14998	0.0659365	3.47543	0.00058639	0.00258291	-0.494807
KEGG_NOTCH_SIGNALING_PATHWAY	-0.12748	-0.0999245	-3.38896	0.000796727	0.00337212	-0.768674
KEGG_OTHER_GLYCAN_DEGRADATION	-0.154764	-0.0558581	-3.3593	0.000883826	0.00357337	-0.861175
KEGG_BASE_EXCISION_REPAIR	-0.154412	-0.126446	-3.35778	0.000888515	0.00357337	-0.86589
KEGG_T_CELL_RECEPTOR_SIGNALING_PATHWAY	-0.12367	-0.0728336	-3.23607	0.00134932	0.00531116	-1.23732
KEGG_HOMOLOGOUS_RECOMBINATION	-0.170275	-0.151016	-3.19436	0.00155263	0.0059571	-1.36168
KEGG_TOLL_LIKE_RECEPTOR_SIGNALING_PATHWAY	-0.104546	-0.0485605	-3.18955	0.00157783	0.0059571	-1.37594
KEGG_RNA_DEGRADATION	-0.126152	-0.119433	-3.07286	0.0023176	0.00857512	-1.71541
KEGG_FOCAL_ADHESION	-0.103522	-0.0509638	-3.05133	0.00248485	0.00884032	-1.77674
KEGG_DNA_REPLICATION	-0.186719	-0.15203	-3.03279	0.00263775	0.00920724	-1.82924
KEGG_N_GLYCAN_BIOSYNTHESIS	-0.120346	-0.0908193	-3.01975	0.00275039	0.00932646	-1.86599
KEGG_B_CELL_RECEPTOR_SIGNALING_PATHWAY	-0.111274	-0.0567639	-2.94565	0.00347864	0.0114621	-2.07194
KEGG_SPLICEOSOME	-0.146409	-0.121406	-2.94084	0.00353158	0.0114621	-2.08516
KEGG_OXIDATIVE_PHOSPHORYLATION	0.130668	-0.0351513	2.75844	0.00616936	0.0181164	-2.57084
KEGG_PARKINSONS_DISEASE	0.116883	-0.0251158	2.64711	0.00855295	0.0232691	-2.85278
KEGG_COMPLEMENT_AND_COAGULATION_CASCADES	0.130458	0.121727	2.50077	0.0129331	0.0332308	-3.20658

## Sheet: Table S5
Table S5. GSVA enrichment analysis investigate the biological function in cluster 3.
id	logFC	AveExpr	t	P.Value	adj.P.Val	B
KEGG_PPAR_SIGNALING_PATHWAY	-0.428235	-0.0367231	-11.4132	3.42809e-25	6.34197e-23	46.4916
KEGG_PRIMARY_BILE_ACID_BIOSYNTHESIS	-0.649307	-0.0510326	-10.7336	7.15313e-23	6.61665e-21	41.2454
KEGG_PEROXISOME	-0.420022	-0.0444663	-10.6181	1.74824e-22	1.07808e-20	40.3679
KEGG_LINOLEIC_ACID_METABOLISM	-0.40724	-0.0472979	-10.5115	3.97645e-22	1.83911e-20	39.561
KEGG_BETA_ALANINE_METABOLISM	-0.518237	-0.0446361	-10.453	6.2335e-22	2.30639e-20	39.1196
KEGG_FATTY_ACID_METABOLISM	-0.57858	-0.0585386	-10.4094	8.70512e-22	2.68408e-20	38.7917
KEGG_GLYCINE_SERINE_AND_THREONINE_METABOLISM	-0.540638	-0.0463037	-10.1894	4.65978e-21	1.23151e-19	37.1449
KEGG_HISTIDINE_METABOLISM	-0.374051	-0.0554535	-10.069	1.15803e-20	2.67796e-19	36.2514
KEGG_ARGININE_AND_PROLINE_METABOLISM	-0.36515	-0.0470182	-10.0283	1.5736e-20	3.23463e-19	35.9505
KEGG_COMPLEMENT_AND_COAGULATION_CASCADES	-0.521322	-0.0648085	-9.90981	3.83199e-20	7.08919e-19	35.0772
KEGG_PROPANOATE_METABOLISM	-0.504638	-0.0576936	-9.88574	4.58822e-20	7.71655e-19	34.9005
KEGG_ALANINE_ASPARTATE_AND_GLUTAMATE_METABOLISM	-0.381226	-0.0626941	-9.81304	7.89533e-20	1.2172e-18	34.368
KEGG_BUTANOATE_METABOLISM	-0.475467	-0.0420096	-9.75977	1.17371e-19	1.67028e-18	33.979
KEGG_PHENYLALANINE_METABOLISM	-0.403344	-0.0425421	-9.74317	1.32779e-19	1.75458e-18	33.858
KEGG_RETINOL_METABOLISM	-0.4772	-0.0432374	-9.61767	3.3623e-19	4.14684e-18	32.9467
KEGG_DRUG_METABOLISM_CYTOCHROME_P450	-0.463915	-0.0339179	-9.4291	1.34268e-18	1.51527e-17	31.5889
KEGG_STEROID_HORMONE_BIOSYNTHESIS	-0.402631	-0.0240667	-9.42412	1.39241e-18	1.51527e-17	31.5532
KEGG_TRYPTOPHAN_METABOLISM	-0.46477	-0.0565531	-9.4033	1.62098e-18	1.66601e-17	31.4042
KEGG_VALINE_LEUCINE_AND_ISOLEUCINE_DEGRADATION	-0.534173	-0.0490576	-9.28823	3.74297e-18	3.64447e-17	30.5838
KEGG_LIMONENE_AND_PINENE_DEGRADATION	-0.525356	-0.0435211	-9.23172	5.63445e-18	5.21186e-17	30.1829
KEGG_TYROSINE_METABOLISM	-0.339242	-0.0504786	-9.1628	9.26225e-18	8.1596e-17	29.6957
KEGG_PYRUVATE_METABOLISM	-0.320539	-0.0583268	-8.96194	3.89827e-17	3.27809e-16	28.2876
KEGG_DRUG_METABOLISM_OTHER_ENZYMES	-0.342291	-0.0414618	-8.89408	6.31026e-17	5.07564e-16	27.8157
KEGG_BIOSYNTHESIS_OF_UNSATURATED_FATTY_ACIDS	-0.354603	-0.0367491	-8.61091	4.60618e-16	3.5506e-15	25.8693
KEGG_ABC_TRANSPORTERS	-0.262657	-0.0192878	-8.50611	9.52379e-16	7.0476e-15	25.1583
KEGG_METABOLISM_OF_XENOBIOTICS_BY_CYTOCHROME_P450	-0.391795	-0.0337519	-8.40912	1.85688e-15	1.32124e-14	24.505
KEGG_CYSTEINE_AND_METHIONINE_METABOLISM	-0.219806	-0.0585261	-8.29521	4.04459e-15	2.77129e-14	23.7434
KEGG_PROXIMAL_TUBULE_BICARBONATE_RECLAMATION	-0.276634	-0.0410645	-8.28854	4.23249e-15	2.79647e-14	23.699
KEGG_GLYCEROLIPID_METABOLISM	-0.190321	-0.0289704	-8.2586	5.1874e-15	3.3092e-14	23.5
KEGG_NITROGEN_METABOLISM	-0.305114	-0.0403431	-8.193	8.08939e-15	4.98846e-14	23.0655
KEGG_SPLICEOSOME	0.409711	0.0380996	8.13049	1.23281e-14	7.35707e-14	22.6536
KEGG_CELL_CYCLE	0.347206	0.00238182	7.97459	3.4963e-14	2.0213e-13	21.6347
KEGG_ADIPOCYTOKINE_SIGNALING_PATHWAY	-0.200359	-0.0359731	-7.92446	4.8758e-14	2.73341e-13	21.3098
KEGG_GLYOXYLATE_AND_DICARBOXYLATE_METABOLISM	-0.283654	-0.0735624	-7.79185	1.16785e-13	6.35449e-13	20.4565
KEGG_ALPHA_LINOLENIC_ACID_METABOLISM	-0.228636	-0.044449	-7.73992	1.64e-13	8.66857e-13	20.125
KEGG_STARCH_AND_SUCROSE_METABOLISM	-0.288548	-0.0218747	-7.62853	3.38092e-13	1.73742e-12	19.4187
KEGG_ARACHIDONIC_ACID_METABOLISM	-0.244289	-0.043283	-7.61778	3.62424e-13	1.81212e-12	19.3509
KEGG_HOMOLOGOUS_RECOMBINATION	0.403833	0.0138388	7.50569	7.45019e-13	3.62707e-12	18.6477
KEGG_GLYCOLYSIS_GLUCONEOGENESIS	-0.253213	-0.0404471	-7.50127	7.66379e-13	3.63539e-12	18.6202
KEGG_ASCORBATE_AND_ALDARATE_METABOLISM	-0.406422	-0.012409	-7.48023	8.76648e-13	4.0545e-12	18.489
KEGG_CITRATE_CYCLE_TCA_CYCLE	-0.326293	-0.0617621	-7.35042	1.99859e-12	9.01803e-12	17.6853
KEGG_RNA_POLYMERASE	0.314129	-0.029565	7.29337	2.86244e-12	1.26084e-11	17.3351
KEGG_RNA_DEGRADATION	0.303927	0.00404999	7.19147	5.412e-12	2.32842e-11	16.7144
KEGG_DNA_REPLICATION	0.422575	0.0229875	6.92891	2.71726e-11	1.14248e-10	15.1432
KEGG_RENIN_ANGIOTENSIN_SYSTEM	-0.232252	-0.0269403	-6.7063	1.03359e-10	4.24918e-10	13.8438
KEGG_PENTOSE_AND_GLUCURONATE_INTERCONVERSIONS	-0.323638	-0.0250378	-6.65839	1.37246e-10	5.51967e-10	13.5683
KEGG_PATHOGENIC_ESCHERICHIA_COLI_INFECTION	0.232081	-0.0132248	6.50335	3.40264e-10	1.33934e-09	12.6864
KEGG_NON_HOMOLOGOUS_END_JOINING	0.334392	0.006395	6.42688	5.29532e-10	2.0409e-09	12.2571
KEGG_LYSINE_DEGRADATION	-0.220266	-0.0328475	-6.36355	7.61622e-10	2.87551e-09	11.9045
KEGG_NUCLEOTIDE_EXCISION_REPAIR	0.290299	0.000702467	6.33002	9.2229e-10	3.41247e-09	11.7188
KEGG_PORPHYRIN_AND_CHLOROPHYLL_METABOLISM	-0.246155	-0.033019	-6.12073	2.99633e-09	1.08691e-08	10.577
KEGG_BASE_EXCISION_REPAIR	0.284489	-0.000176064	6.07176	3.93108e-09	1.39856e-08	10.3141
KEGG_OLFACTORY_TRANSDUCTION	-0.124048	0.147748	-5.8892	1.06668e-08	3.72333e-08	9.34849
KEGG_MATURITY_ONSET_DIABETES_OF_THE_YOUNG	-0.193367	0.0219859	-5.82766	1.4859e-08	5.09057e-08	9.02817
KEGG_MISMATCH_REPAIR	0.321632	0.013825	5.66179	3.58394e-08	1.20551e-07	8.17815
KEGG_PYRIMIDINE_METABOLISM	0.179676	-0.0310344	5.64038	4.00964e-08	1.32461e-07	8.06989
KEGG_FOLATE_BIOSYNTHESIS	-0.248497	-0.0488008	-5.59038	5.2053e-08	1.68944e-07	7.81822
KEGG_OOCYTE_MEIOSIS	0.173749	-0.00140236	5.5738	5.67346e-08	1.80964e-07	7.7352
KEGG_PURINE_METABOLISM	0.125297	-0.0332319	5.50606	8.05031e-08	2.52425e-07	7.39803
KEGG_NICOTINATE_AND_NICOTINAMIDE_METABOLISM	-0.179048	-0.0488206	-5.40485	1.34978e-07	4.16183e-07	6.90044
KEGG_PROGESTERONE_MEDIATED_OOCYTE_MATURATION	0.170552	-0.00120301	5.39239	1.43773e-07	4.36031e-07	6.83971
KEGG_PANTOTHENATE_AND_COA_BIOSYNTHESIS	-0.173579	-0.0515538	-5.31231	2.15127e-07	6.41912e-07	6.45213
KEGG_TAURINE_AND_HYPOTAURINE_METABOLISM	-0.206832	-0.0283324	-5.25116	2.91753e-07	8.56735e-07	6.15933
KEGG_UBIQUITIN_MEDIATED_PROTEOLYSIS	0.212606	0.00248305	5.17933	4.15849e-07	1.20206e-06	5.819
KEGG_STEROID_BIOSYNTHESIS	-0.266428	-0.0427471	-4.9865	1.05686e-06	3.00797e-06	4.92476
KEGG_VASOPRESSIN_REGULATED_WATER_REABSORPTION	0.174283	-0.0200205	4.94562	1.28341e-06	3.59743e-06	4.73884
KEGG_VIBRIO_CHOLERAE_INFECTION	0.171596	-0.0277742	4.93541	1.34694e-06	3.71918e-06	4.69259
KEGG_ONE_CARBON_POOL_BY_FOLATE	-0.156668	-0.0650943	-4.90016	1.59051e-06	4.32713e-06	4.53358
KEGG_BASAL_TRANSCRIPTION_FACTORS	0.210087	0.00683403	4.89373	1.63928e-06	4.39518e-06	4.5047
KEGG_TERPENOID_BACKBONE_BIOSYNTHESIS	-0.223743	-0.055645	-4.62366	5.67095e-06	1.49875e-05	3.32011
KEGG_GALACTOSE_METABOLISM	-0.132659	-0.0228305	-4.58653	6.69694e-06	1.74498e-05	3.16177
KEGG_FC_GAMMA_R_MEDIATED_PHAGOCYTOSIS	0.172646	-0.0100116	4.58208	6.83139e-06	1.75529e-05	3.14285
KEGG_RIBOSOME	0.324117	-0.0402949	4.51895	9.03961e-06	2.29086e-05	2.8764
KEGG_BLADDER_CANCER	0.139948	-0.0275239	4.49184	1.01853e-05	2.51407e-05	2.76297
KEGG_MTOR_SIGNALING_PATHWAY	0.142506	-0.00940835	4.49169	1.01922e-05	2.51407e-05	2.76233
KEGG_NOTCH_SIGNALING_PATHWAY	0.175983	-0.0124141	4.46299	1.15576e-05	2.81336e-05	2.64288
KEGG_SNARE_INTERACTIONS_IN_VESICULAR_TRANSPORT	0.163309	-0.0142538	4.36802	1.74403e-05	4.19021e-05	2.25241
KEGG_PANCREATIC_CANCER	0.151649	-0.00383986	4.35479	1.8459e-05	4.3781e-05	2.19859
KEGG_GLYCOSAMINOGLYCAN_BIOSYNTHESIS_KERATAN_SULFATE	0.140279	-0.019492	4.29209	2.41117e-05	5.64641e-05	1.94551
KEGG_ENDOCYTOSIS	0.132888	-0.00929688	4.24419	2.95085e-05	6.82385e-05	1.75437
KEGG_ALDOSTERONE_REGULATED_SODIUM_REABSORPTION	-0.102773	-0.0152011	-4.17608	3.92065e-05	8.95458e-05	1.48578
KEGG_EPITHELIAL_CELL_SIGNALING_IN_HELICOBACTER_PYLORI_INFECTION	0.124347	-0.0212144	3.70447	0.000253339	0.000570413	-0.266889
KEGG_NEUROTROPHIN_SIGNALING_PATHWAY	0.121332	-0.00136188	3.70178	0.000255915	0.000570413	-0.276332
KEGG_RENAL_CELL_CARCINOMA	0.126042	-0.00357536	3.63914	0.000323443	0.000712346	-0.49469
KEGG_CHRONIC_MYELOID_LEUKEMIA	0.132673	-0.00975335	3.6281	0.000336966	0.000733397	-0.532838
KEGG_COLORECTAL_CANCER	0.122648	-0.00474258	3.60563	0.000366129	0.000787603	-0.610107
KEGG_THYROID_CANCER	0.127349	-0.0159087	3.56994	0.000417394	0.000887563	-0.731988
KEGG_NON_SMALL_CELL_LUNG_CANCER	0.106949	-0.0115722	3.54495	0.000457207	0.000961173	-0.816637
KEGG_GLYCOSYLPHOSPHATIDYLINOSITOL_GPI_ANCHOR_BIOSYNTHESIS	0.155646	-0.0119174	3.50911	0.000520561	0.00108207	-0.937094
KEGG_PROTEASOME	0.194805	-0.0335469	3.44993	0.000643498	0.00132275	-1.13357
KEGG_CYTOSOLIC_DNA_SENSING_PATHWAY	0.101239	0.00633379	3.20954	0.00147773	0.00293958	-1.89979
KEGG_SYSTEMIC_LUPUS_ERYTHEMATOSUS	-0.160613	-0.0256269	-3.07704	0.00228916	0.00450526	-2.30008
KEGG_SMALL_CELL_LUNG_CANCER	0.106598	-0.00893562	3.04554	0.00253478	0.00489352	-2.39294
KEGG_N_GLYCAN_BIOSYNTHESIS	0.119376	-0.0214955	3.01332	0.00281078	0.00530606	-2.48697
KEGG_RIBOFLAVIN_METABOLISM	0.110467	-0.0395926	2.89133	0.00412443	0.00755465	-2.83448
KEGG_NOD_LIKE_RECEPTOR_SIGNALING_PATHWAY	0.112513	-0.0170401	2.85886	0.0045581	0.00826715	-2.92471
KEGG_GLYCOSAMINOGLYCAN_BIOSYNTHESIS_CHONDROITIN_SULFATE	0.110699	-0.0245002	2.81706	0.00517731	0.00920963	-3.03943
KEGG_PROTEIN_EXPORT	0.123807	-0.0580482	2.70359	0.007262	0.0125558	-3.34277

## Sheet: Table S6
Table S6. The differently expressed lncRNAs were selected as independent prognosis factors of HCC patients based on the lasso regression.
lncRNA	Coef
AL031985.3	0.189411
NRAV	0.012204
OSMR-AS1	0.204676
AC073611.1	0.243738
MKLN1-AS	0.18229
AL137186.2	0.225826
AL049840.4	0.00445698
MIR4435-2HG	0.00546578
AL118511.1	0.0244753
